# Supplementary material for: Circulation of SARS-CoV–Related Coronaviruses and Alphacoronaviruses in Bats from Croatia
Source: MDPI journal article supplement (doi:10.3390/microorganisms11040959), 2023-04-07
Supplement: s1 [file s1]

Table S1. Results of the serological survey of bats for SARS-CoV-2 neutralizing antibodies

| Sample mark | Sample no. | Bat species                        | Sex | cPASS SARS-CoV-2 Neutralization Antibody Detection Kit (Inhibition %) |
|-------------|------------|------------------------------------|-----|-----------------------------------------------------------------------|
| B1          | 1          | <i>Miniopterus schreibersii</i>    | m   | -6,12/neg                                                             |
| B4          | 2          | <i>Myotis capaccinii</i>           | m   | -9,81/neg                                                             |
| B6          | 3          | <i>Myotis capaccinii</i>           | m   | 3,65/neg                                                              |
| B7          | 4          | <i>Myotis capaccinii</i>           | m   | 16,71/neg                                                             |
| B8          | 5          | <i>Miniopterus schreibersii</i> *  | m   | 13,24/neg                                                             |
| B9          | 6          | <i>Myotis capaccinii</i>           | m   | 19,05/neg                                                             |
| B10         | 7          | <i>Myotis capaccinii</i> *         | f   | N/A**                                                                 |
| B12         | 8          | <i>Miniopterus schreibersii</i> *  | m   | 19,61/neg                                                             |
| B13         | 9          | <i>Myotis myotis</i> *             | f   | 6,03/neg                                                              |
| B14         | 10         | <i>Rhinolophus ferrumequinum</i>   | m   | -15,62/neg                                                            |
| B15         | 11         | <i>Rhinolophus ferrumequinum</i>   | m   | -10,87/neg                                                            |
| B16         | 12         | <i>Rhinolophus ferrumequinum</i>   | f   | -1,45/neg                                                             |
| B17         | 13         | <i>Myotis capaccinii</i>           | m   | 5,59/neg                                                              |
| B18         | 14         | <i>Miniopterus schreibersii</i>    | m   | 14,12/neg                                                             |
| B19         | 15         | <i>Miniopterus schreibersii</i>    | m   | 28,55/pos                                                             |
| B20         | 16         | <i>Rhinolophus ferrumequinum</i> * | f   | 10,69/neg                                                             |
| B21         | 17         | <i>Miniopterus schreibersii</i>    | f   | 18,26/neg                                                             |
| B22         | 18         | <i>Myotis myotis</i>               | m   | -6,82/neg                                                             |
| B23         | 19         | <i>Myotis myotis</i>               | m   | 1,54/neg                                                              |
| B24         | 20         | <i>Miniopterus schreibersii</i>    | m   | 7,44/neg                                                              |
| B25         | 21         | <i>Miniopterus schreibersii</i>    | m   | 19,67/neg                                                             |
| B27         | 22         | <i>Rhinolophus ferrumequinum</i>   | m   | 26,70/pos                                                             |
| B28         | 23         | <i>Miniopterus schreibersii</i> *  | m   | 29,78/pos                                                             |
| B29         | 24         | <i>Myotis myotis</i>               | m   | 19,23/neg                                                             |
| B30         | 25         | <i>Miniopterus schreibersii</i> *  | f   | 14,83/neg                                                             |
| B31         | 26         | <i>Rhinolophus ferrumequinum</i>   | f   | -0,92/neg                                                             |
| B32         | 27         | <i>Myotis myotis</i>               | f   | -7,17/neg                                                             |
| B33         | 28         | <i>Myotis myotis</i>               | f   | 26,88/pos                                                             |
| B34         | 29         | <i>Myotis myotis</i>               | m   | 28,20/pos                                                             |
| B35         | 30         | <i>Myotis myotis</i>               | m   | 30,49/pos                                                             |
| B36         | 31         | <i>Rhinolophus ferrumequinum</i>   | f   | 18,43/neg                                                             |
| B37         | 32         | <i>Myotis capaccinii</i> *         | m   | N/A**                                                                 |
| B38         | 33         | <i>Miniopterus schreibersii</i> *  | f   | N/A**                                                                 |
| B39         | 34         | <i>Miniopterus schreibersii</i>    | m   | 25,30/pos                                                             |
| B40         | 35         | <i>Myotis capaccinii</i>           | f   | 24,59/pos                                                             |
| B41         | 36         | <i>Myotis capaccinii</i>           | f   | -2,60/neg                                                             |
| B42         | 37         | <i>Miniopterus schreibersii</i>    | m   | 0,92/neg                                                              |
| B43         | 38         | <i>Myotis capaccinii</i> *         | m   | N/A**                                                                 |
| B44         | 39         | <i>Myotis capaccinii</i> *         | f   | 18,70/neg                                                             |
| B45         | 40         | <i>Miniopterus schreibersii</i>    | m   | 30,40/pos                                                             |
| B46         | 41         | <i>Myotis capaccinii</i>           | m   | 33,92/pos                                                             |

\* Bat dropping collected.

\*\* Blood sample not collected.

Table S2. List of primers and probes used in this study.

| Gene target/assay type                      | Primer and probe sequences                                                                                                                                                                                                                                                                               | Reference               |
|---------------------------------------------|----------------------------------------------------------------------------------------------------------------------------------------------------------------------------------------------------------------------------------------------------------------------------------------------------------|-------------------------|
| E/real-time                                 | E_Sarbeco_F1: ACAGGTACGTTAATAGTTAATAGCGT<br>E_Sarbeco_R2: ATATTGCAGCAGTACGCACACA<br>FAM-ACACTAGCCATCCTTACTGCGCTTCG-BHQ1                                                                                                                                                                                  | Corman et al., 2020.    |
| RdRp/real-time                              | RdRP_SARSr-F: GTGARATGGTCATGTGTGGCGG<br>RdRP_SARSr-R: CARATGTTAAASACACTATTAGCATA<br>RdRP_SARSr-P1 (pan Sarbeco):<br>FAM-CCAGGTGGWACRTCATCMGGTGATGC-BBQ<br>RdRP_SARSr-P2 (SARS-CoV-2):<br>FAM-CAGGTGGAACCTCATCAGGAGATGC-BBQ                                                                               | Corman et al., 2020.    |
| N1/N2 + Human RNase P gene /real-time       | N1f: GACCCCAAATCAGCGAAAT<br>N1r: TCTGGTTACTGCCAGTTGAATCTG<br>FAM-ACCCCGCATTACGTTTGGTGGACC-BHQ1<br>N2f: TTACAAACATTGGCCGCAAA<br>N2r: GCGCGACATTCCGAAGAA<br>FAM-ACAATTTGCCCCAGCGCTTCAG-BHQ1<br>RNaseP F: AGATTTGGACCTGCGAGCG<br>RNaseP R: GAGCGGCTGTCTCCACAAGT<br>RNaseP: FAM-TTCTGACCTGAAGGCTCTGCGCG-BHQ1 | Lu et al., 2020.        |
| RdRp pan-CoV assay/semi-nested conventional | pan-CoV_outF: 5'- CCAARTTYTAYGGHGGITGG-3'<br>pan-CoV_R: 5'- TGTTGIGARCARAAYTCATGIGG-3'<br>pan-CoV_inF: 5'- GGTTGGGAYTAYCCHAARTGTGA-3'                                                                                                                                                                    | Xiu et al., 2020.       |
| Mammalian beta actin/real-time              | ACT-1005-F: CAGCACAATGAAGATCAAGATCATC<br>ACT-1135-R: CGGACTCATCGTACTCCTGCTT<br>ACT-1081-HEX: HEX-TCGCTGTCCACCTCCAGCAGATGT-BHQ1                                                                                                                                                                           | Toussiant et al., 2007. |

Table S3. Detailed list of sequences used in phylogenetic analysis.

| AlphaCoV strain name             | Accession no. | Bat species                      |
|----------------------------------|---------------|----------------------------------|
| Bat coronavirus CDPHE15/USA/2006 | NC_022103     | <i>Myotis lucifugus</i>          |
| BtRf-AlphaCoV/HuB2013            | NC_028814     | <i>Rhinolophus ferrumequinum</i> |
| Rousettus bat coronavirus HKU10  | NC_018871     | <i>Rousettus aegypticus</i>      |
| Bat coronavirus 1A               | NC_010437     | <i>Miniopterus sp.</i>           |
| Miniopterus bat coronavirus HKU8 | NC_010438     | <i>Miniopterus sp.</i>           |
| BtMf-AlphaCoV/FJ2012             | KJ473799      | <i>Miniopterus fuliginosus</i>   |

|                                                         |                     |                                  |
|---------------------------------------------------------|---------------------|----------------------------------|
| BtMf-AlphaCoV/HeN2013                                   | KJ473800            | <i>Miniopterus fuliginosus</i>   |
| BtMf-AlphaCoV/HuB2013                                   | KJ473798            | <i>Miniopterus fuliginosus</i>   |
| Neixiang-64                                             | KF294282            | <i>Miniopterus schreibersii</i>  |
| HKU8-related isolate 6610                               | MN611518            | <i>Miniopterus pusillus</i>      |
| Isolate 161454                                          | MN611524            | <i>Miniopterus schreibersii</i>  |
| BtMf-AlphaCoV/GD2012                                    | KJ473797            | <i>Miniopterus fuliginosus</i>   |
| Kenya/KY33/2006                                         | HQ728485            | <i>Miniopterus inflatus</i>      |
| Anlong-36                                               | KF294271            | <i>Miniopterus schreibersii</i>  |
| HKU7                                                    | DQ249226            | <i>Miniopterus magnater</i>      |
| Bat-CoV/P.kuhlil/Italy/3398-19/2015                     | NC_046964           | <i>Pipistrellus kuhlii</i>       |
| BtNv-AlphaCoV/SC2013                                    | NC_028833           | <i>Nyctalus velutinus</i>        |
| BtRf-AlphaCoV/YN2012                                    | NC_028824           | <i>Rhinolophus ferrumequinum</i> |
| Rhinolophus bat coronavirus HKU2                        | NC_009988           | <i>Rhinolophus sinicus</i>       |
| BetaCoV strain name                                     | Accession no.       | Bat species                      |
| Human coronavirus HKU1                                  | NC_006577           | <i>Homo sapiens</i>              |
| Bat Hp-betacoronavirus/Zhejiang2013                     | NC_025217           | <i>Hipposideros pratti</i>       |
| Zaria bat coronavirus strain ZBCoV                      | HQ166910            | <i>Hipposideros commersoni</i>   |
| MERS-related coronavirus                                | NC_019843           | <i>Homo sapiens</i>              |
| Pipistrellus bat coronavirus HKU5                       | NC_009020           | <i>Pipistrellus abramus</i>      |
| Rousettus bat coronavirus                               | NC_030886           | <i>Rousettus leschenaulti</i>    |
| Rousettus bat coronavirus HKU9                          | NC_009021           | <i>Rousettus leschenaulti</i>    |
| Bat coronavirus BM48-31/BGR/2008                        | NC_014470; GU190215 | <i>Rhinolophus blasii</i>        |
| SARS coronavirus Tor2                                   | NC_004718           | <i>Homo sapiens</i>              |
| Bat_SARS-like_coronavirus_BtCoV/Khosta-1/Rh/Russia/2020 | MZ190137            | <i>Rhinolophus ferrumequinum</i> |
| Bat_SARS_coronavirus_Rm1                                | DQ412043            | <i>Rhinolophus macrotis</i>      |
| Bat_SARS_coronavirus_HKU3-13                            | GQ153548            | <i>Rhinolophus sinicus</i>       |
| Bat_coronavirus_isolate_Anlong-112                      | KY770859            | <i>Rhinolophus sinicus</i>       |
| Bat_SARS-like_coronavirus_isolate_Rs4237                | KY417147            | <i>Rhinolophus sinicus</i>       |
| Bat_SARS-like_coronavirus_YNLF_31C                      | KP886808            | <i>Rhinolophus Ferrumequinum</i> |
| Bat_SARS_CoV_Rs672/2006                                 | FJ588686            | <i>Rhinolophus sinicus</i>       |

|                                                          |                            |                                  |
|----------------------------------------------------------|----------------------------|----------------------------------|
| SARS-related_coronavirus_Rc-o319                         | LC556375                   | <i>Rhinolophus cornutus</i>      |
| Pangolin_coronavirus_isolate_PCoV_GX-P3B                 | MT072865                   | <i>Manis javanica</i>            |
| Bat_coronavirus_RaTG13                                   | MN996532                   | <i>Rhinolophus affinis</i>       |
| Bat_coronavirus_RacCS203                                 | MW251308                   | <i>Rhinolophus acuminatus</i>    |
| Bat_coronavirus_strain_BetaCoV/Rm/Yunnan/Y N02/2019      | MW201981                   | <i>Rhinolophus malayanus</i>     |
| SarBatCoV1                                               | MG975784                   | <i>Rhinolophus ferrumequinum</i> |
| LUX/LUX16_A_37/2016                                      | KY502396                   | <i>Rhinolophus ferrumequinum</i> |
| Bat_coronavirus_isolate_PrC31                            | MW703458                   | <i>Rhinolophus blythi</i>        |
| Betacoronavirus sp. RsYN04 strain bat/Yunnan/RsYN04/2020 | MZ081380                   | <i>Rhinolophus steno</i>         |
| Rhinolophus bat coronavirus HKU2 isolate 6427            | MN312267                   | <i>Rhinolophus affinis</i>       |
| BANAL-20-236/Laos/2020                                   | MZ937003                   | <i>Rhinolophus marshalli</i>     |
| Betacoronavirus sp. isolate XN_777                       | MZ491846                   | <i>Rhinolophus pusillus</i>      |
| Sarbecovirus sp. isolate YN2020G                         | OK017857                   | <i>Rhinolophus sinicus</i>       |
| Sarbecovirus sp. isolate GZ2021I                         | OK017831                   | <i>Rhinolophus sinicus</i>       |
| BtRs-BetaCoV/GX2013                                      | KJ473815                   | <i>Rhinolophus sinicus</i>       |
| Sarbecovirus sp. isolate GX2019A                         | OK017859                   | <i>Rhinolophus siamensis</i>     |
| RhGB01                                                   | MW719657                   | <i>Rhinolophus hipposideros</i>  |
| Bat CoV Rst7952                                          | OL674081                   | <i>Rhinolophus steno</i>         |
| hCoV-19/Wuhan/WIV04/2019                                 | EPI_ISL_402124 2019-12-30  | <i>Homo sapiens</i>              |
| hCoV-19/Croatia/1236/2021                                | EPI_ISL_1591279 2021-02-27 | <i>Homo sapiens</i>              |

Table S4. Results of molecular testing of guano swabs

| Sample no | Guano/swab type | E-Sarbeco Real time RT-PCR | Pan-CoV assay/sequencing |
|-----------|-----------------|----------------------------|--------------------------|
| BD1       | Dry swab        | neg                        |                          |
| BD2       | Dry swab        | neg                        |                          |
| BD3       | Dry swab        | neg                        |                          |

|      |                       |          |              |
|------|-----------------------|----------|--------------|
| BD4  | Dry swab              | neg      |              |
| BD5  | Dry swab              | neg      |              |
| BD6  | Dry swab              | neg      |              |
| BD7  | Dry swab              | neg      |              |
| BD8  | Dry swab              | Ct=33,3  | Pos/alphaCoV |
| BD9  | Dry swab              | neg      |              |
| BD10 | Dry swab              | Ct=27,7  | Pos/betaCoV  |
| BS1  | DNA/RNA Shield / Swab | neg      |              |
| BS2  | DNA/RNA Shield / Swab | Ct=32,14 | Pos/alphaCoV |
| BS3  | DNA/RNA Shield / Swab | neg      |              |
| BS4  | DNA/RNA Shield / Swab | neg      |              |
| BS5  | DNA/RNA Shield / Swab | Ct=33,22 | Neg          |
| BS6  | DNA/RNA Shield / Swab | neg      |              |
| BS7  | DNA/RNA Shield / Swab | Ct=33,59 | Neg          |
| BS8  | DNA/RNA Shield / Swab | neg      |              |
| BS9  | DNA/RNA Shield / Swab | neg      |              |

---
